# Supplementary material for: A comparative study of side-chain-type poly(ether ether ketone) anion exchange membrane functionalized with different hetero-cycloaliphatic quaternary ammonium groups
Source: Royal Society of Chemistry journal article supplement (doi:10.1039/c8ra09840a), 2019-01-01
Supplement: c8ra09840a1.pdf [file c8ra09840a1.pdf]

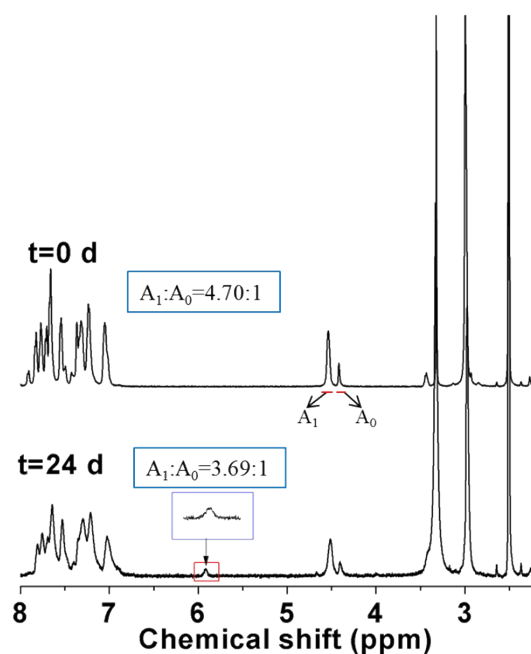

Fig S1. <sup>1</sup>H NMR spectrum of AEMs based from QPEEK-TMA in OH- form before and after storage in 1 M NaOH at 60 °C for 24 days.

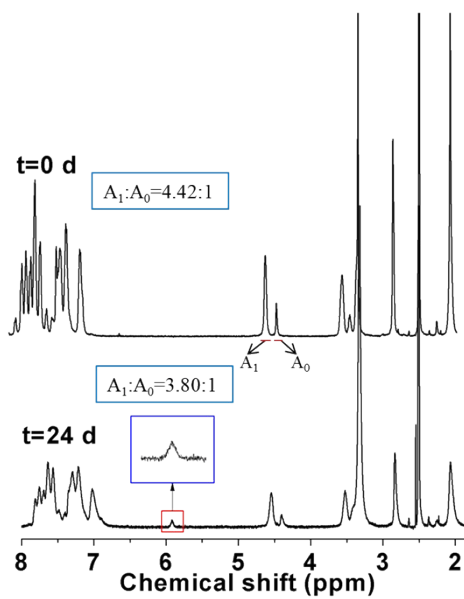

Fig S2. <sup>1</sup>H NMR spectrum of AEMs based from QPEEK-MPY in OH- form before and after storage in 1 M NaOH at 60 °C for 24 days.

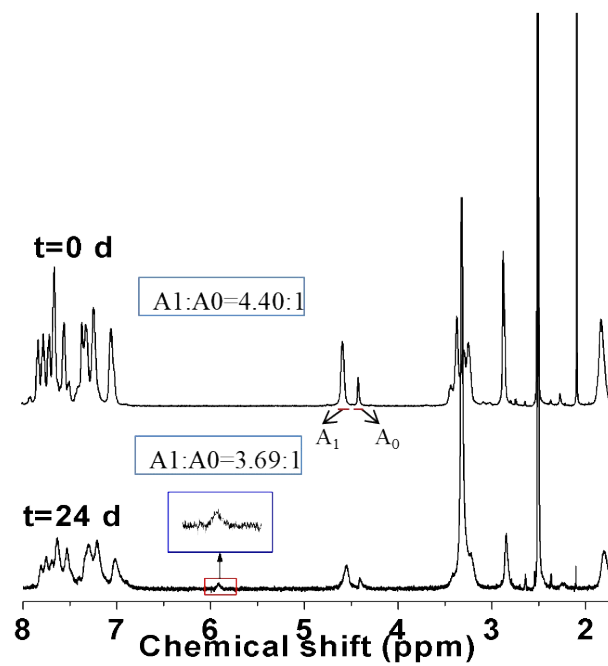

Fig S3.  $^1\text{H}$  NMR spectrum of AEMs based from QPEEK-MPRD in OH- form before and after storage in 1 M NaOH at 60 °C for 24 days.
